# Supplementary material
Source: PubMed Central journal article supplement (PMC1828934)

# Supplementary Figure 1: Alignment of ScClb5p, ScClb6p and AgClb5/6p

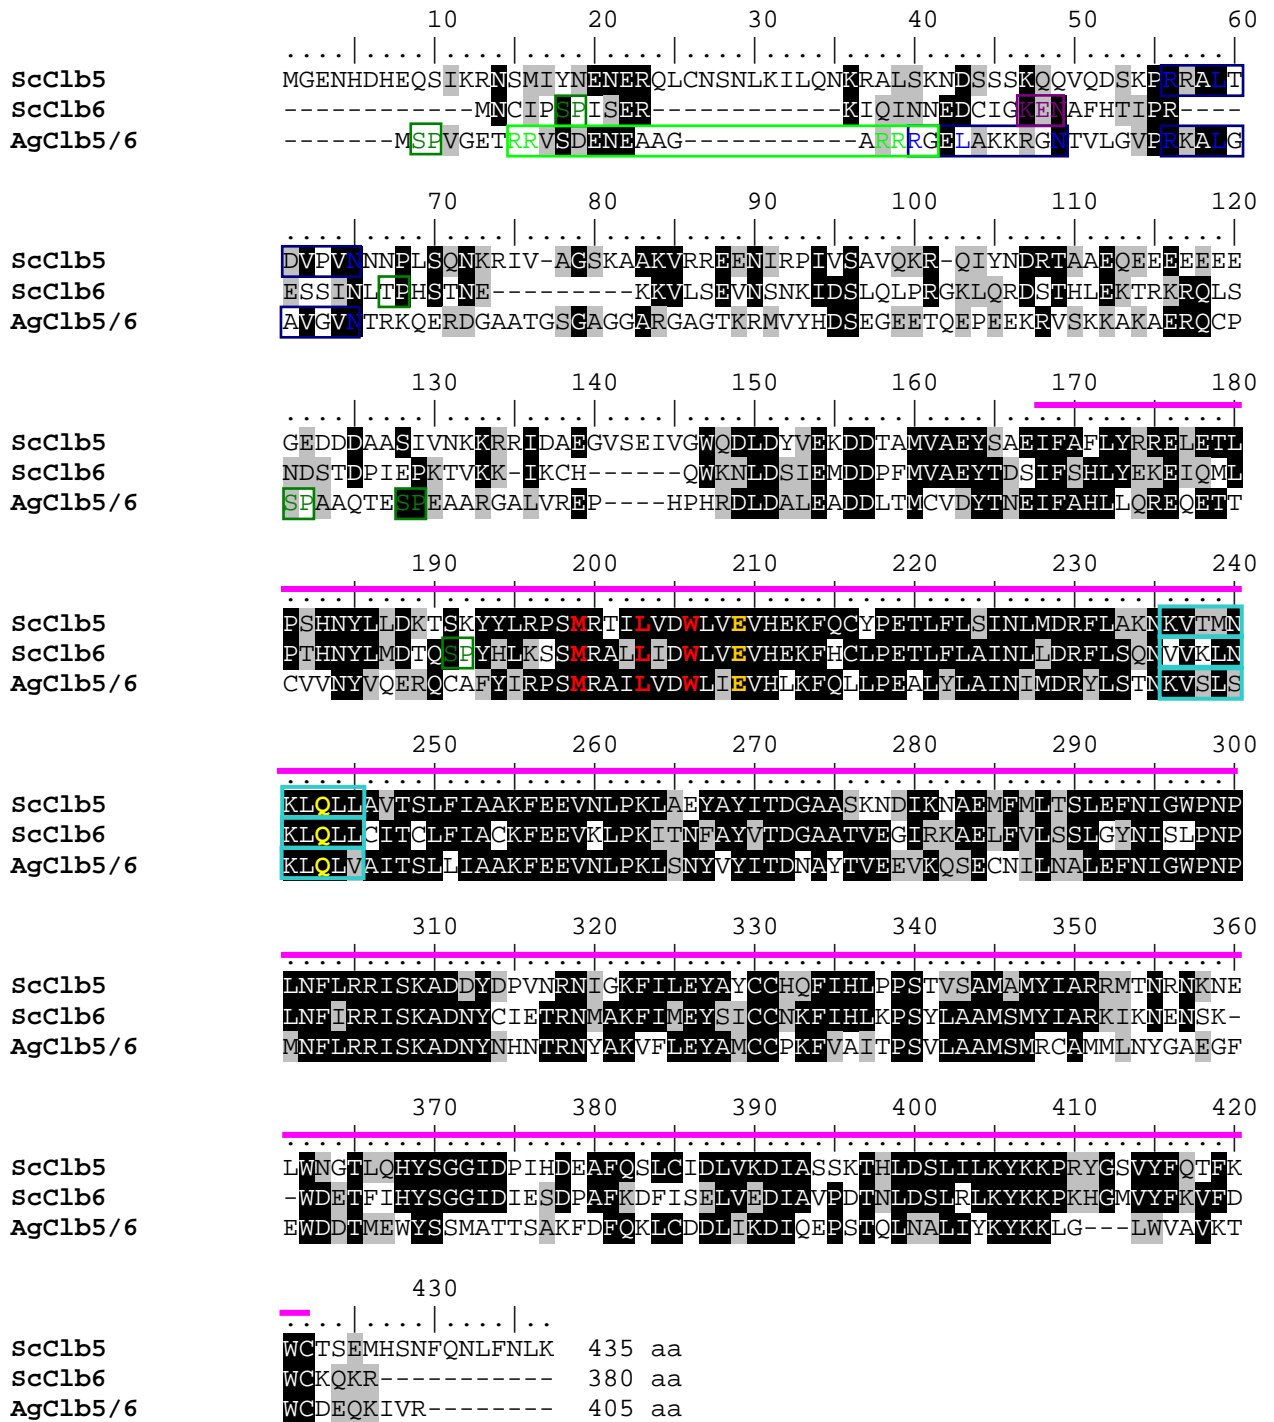

- Cyclin-box (AgClb5/6p: N [145-274 aa], C [276-399 aa])
  - Putative S/TP phosphorylation sites
  - Putative D-box (AgClb5/6p: db1: 22-31 aa; db2: 38-47 aa) □ KEN-box
  - Putative bipartite Nuclear Localization Signal (NLS; AgClb5/6p: 8-24 aa)
  - Putative Nuclear Export Signal (NES; AgClb5/6p: 214-222 aa)
  - Hydrophobic patch (AgClb5/6p: 177, 181 and 184 aa)
  - Salt bridge (AgClb5/6p: 187 aa)
  - H-bond (AgClb5/6p: 221 aa)
- } Cross Jacobson, 2000

Supplementary Figure 4

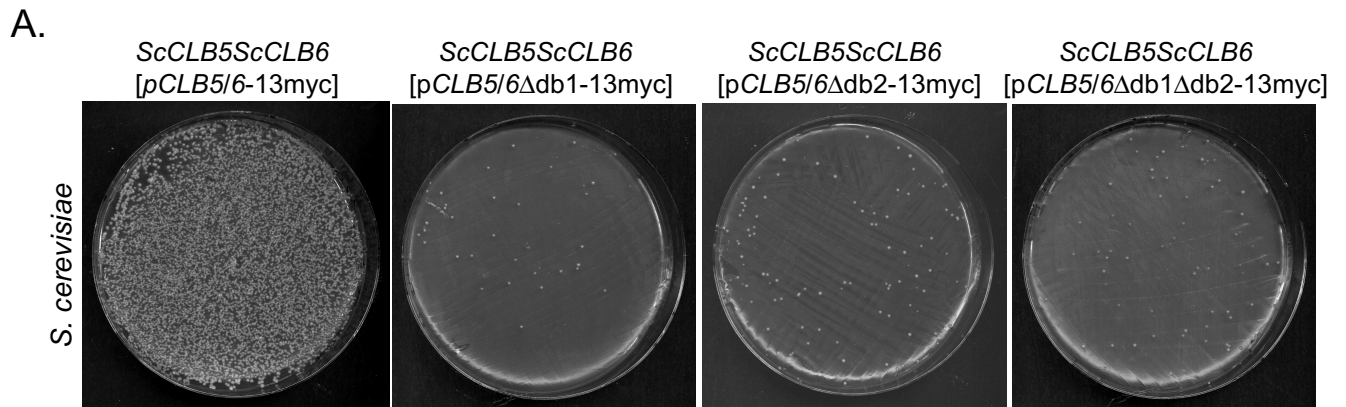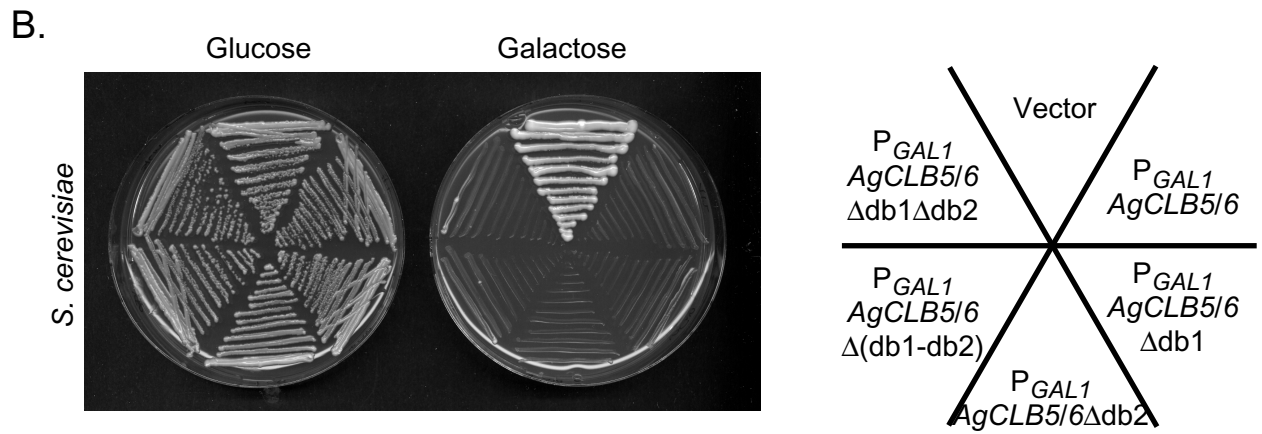

Supplement: eukcell_EC.00273-06_1.pdf [file eukcell_EC.00273-06_1.pdf]
